# Supplementary material for: Genetic modifiers of fetal hemoglobin affect the course of sickle cell disease in patients treated with hydroxyurea
Source: PubMed Central journal article supplement — Haematologica. 2021 Oct 28;107(7):1577–88. doi: 10.3324/haematol.2021.278952 (PMC9244815; doi:10.3324/haematol.2021.278952), 2021-10-28
Supplement: 2021_278952_ALLARD_SUPPL.pdf [file 2021_278952_ALLARD_SUPPL.pdf]

# Genetic modifiers of fetal hemoglobin affect the course of sickle cell disease in patients treated with hydroxyurea

Pierre Allard,<sup>1</sup> Nareen Alhaj,<sup>2</sup> Stephan Lobitz,<sup>3,4</sup> Holger Cario,<sup>4,5</sup> Andreas Jarisch,<sup>4,6</sup> Regine Grosse,<sup>4,7</sup> Lena Oevermann,<sup>4,8</sup> Dani Hakimeh,<sup>4,8</sup> Laura Tagliaferri,<sup>1,4</sup> Elisabeth Kohne,<sup>5</sup> Annette Kopp-Schneider,<sup>2</sup> Andreas E. Kulozik<sup>1,4</sup> and Joachim B. Kunz<sup>1,4</sup> for the German Sickle Cell Disease Study Group.<sup>§</sup>

<sup>1</sup>Department of Pediatric Oncology, Hematology and Immunology, Hopp-Children's Cancer Center (KITZ) Heidelberg, University of Heidelberg, Heidelberg; <sup>2</sup>Abteilung Biostatistik, Deutsches Krebsforschungszentrum (DKFZ), Heidelberg; <sup>3</sup>Gemeinschaftsklinikum Mittelrhein, Kemperhof, Pädiatrische Hämatologie und Onkologie, Koblenz; <sup>4</sup>GPOH Konsortium Sichelzellerkrankheit; <sup>5</sup>Universitätsklinikum Ulm, Klinik für Kinder- und Jugendmedizin, Pädiatrische Hämatologie und Onkologie, Ulm; <sup>6</sup>Klinikum der Johann-Wolfgang-Goethe-Universität, Zentrum für Kinder- und Jugendmedizin, Schwerpunkt Stammzelltransplantation und Immunologie, Frankfurt am Main; <sup>7</sup>Universitätsklinikum Hamburg-Eppendorf, Zentrum für Geburtshilfe, Kinder- und Jugendmedizin, Klinik und Poliklinik für Pädiatrische Hämatologie und Onkologie, Hamburg and <sup>8</sup>Charité - Universitätsmedizin Berlin, Campus Virchow-Klinikum, Klinik für Pädiatrie m.S. Onkologie/Hämatologie/KMT, Berlin, Germany

<sup>§</sup>A list of the members of the Sickle Cell Disease Study Group appears in the Appendix

## Correspondence:

Joachim Kunz  
[joachim.kunz@med.uni-heidelberg.de](mailto:joachim.kunz@med.uni-heidelberg.de)

**Received:** April 11, 2021.

**Accepted:** July 29, 2021.

**Prepublished:** October 28, 2021.

<https://doi.org/10.3324/haematol.2021.278952>

©2022 Ferrata Storti Foundation

Haematologica material is published under a CC

BY-NC license 

# Supplement

**Supplemental Figure 1**  
**Linear Regression of HbF on Age (n=208)**

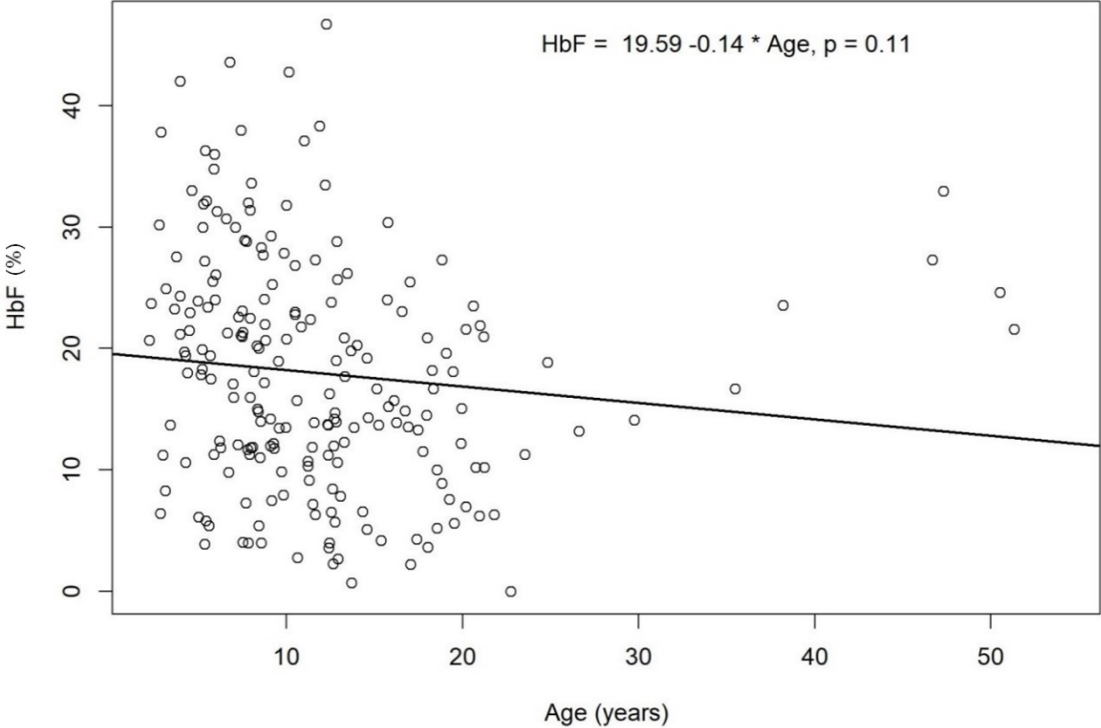

**Supplemental Figure 2**

**HbF by Sex.** Female (n=183): mean HbF  $18.7 \pm \text{SD } 9.3 \%$  vs male (n=177): mean HbF  $17.2 \pm \text{SD } 9.7 \%$ ; T-Test  $p=0.14$

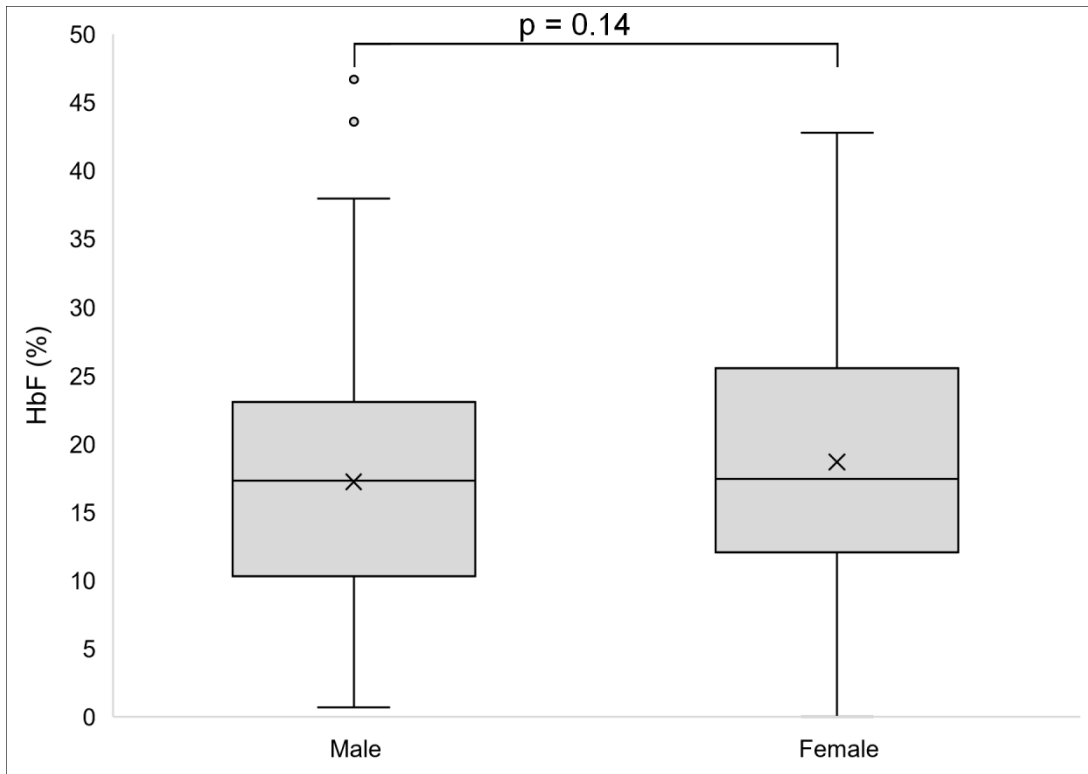

**Supplemental Figure 3**

**HbF before and during HU-Therapy (n=25).** Pre-HU mean HbF  $13.2 \pm SD 5.5$  % vs post-HU mean HbF  $23.7 \pm SD 11.3$  %; T-Test  $p < 10^{-4}$

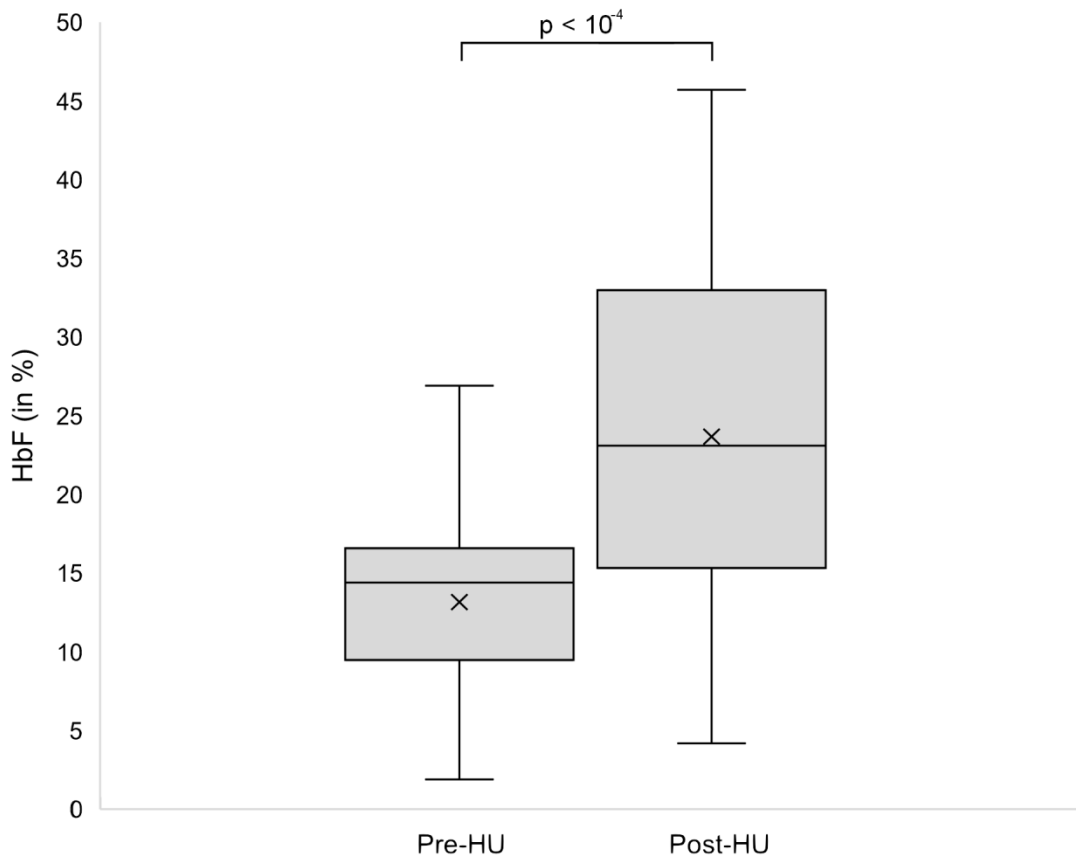

### Supplemental Figure 4

**Laboratory parameters of patients with *BCL11A* rs1427407 GG compared to *BCL11A* rs1427407 GT and *BCL11A* rs1427407 TT.** n- number of patients available for analysis (A) GG patients (n=69) mean HbF  $16.3 \pm 9.8$  % vs GT patients (n=44) mean HbF  $18.6 \pm 8.5$  % vs TT patients (n=9) mean HbF  $30 \pm 8$  %. (B) GG patients (n=89) mean Hb  $8.7 \pm 1.5$  g/dL vs GT patients (n=64) mean Hb  $9.3 \pm 1.5$  g/dL vs TT patients (n=12) mean Hb  $10.5 \pm 1$  g/dL. (C) GG patients (n=89) mean MCV  $88.8 \pm 12.6$  fL vs GT patients (n=64) mean MCV  $90.9 \pm 12.5$  fL vs TT patients (n=12) mean MCV  $98.1 \pm 15.8$  fL. (D) GG patients (n=86) mean reticulocytes  $84.8 \pm 56.2$  ‰ vs GT patients (n=55) mean reticulocytes  $66.2 \pm 34.8$  ‰ vs TT patients (n=13) mean reticulocytes  $50.8 \pm 13.8$  ‰. (E) GG patients (n=84) mean bilirubin  $1.9 \pm 1.1$  mg/dL vs GT patients (n=56) mean bilirubin  $2.5 \pm 2$  mg/dL vs TT patients (n=12) mean bilirubin  $1.6 \pm 0.9$  mg/dL. (F) GG patients (n=85) mean LDH  $525.6 \pm 197.6$  U/L vs GT patients (n=56) mean LDH  $495 \pm 185.7$  U/L vs TT patients (n=12) mean LDH  $442.7 \pm 93.9$  U/L.

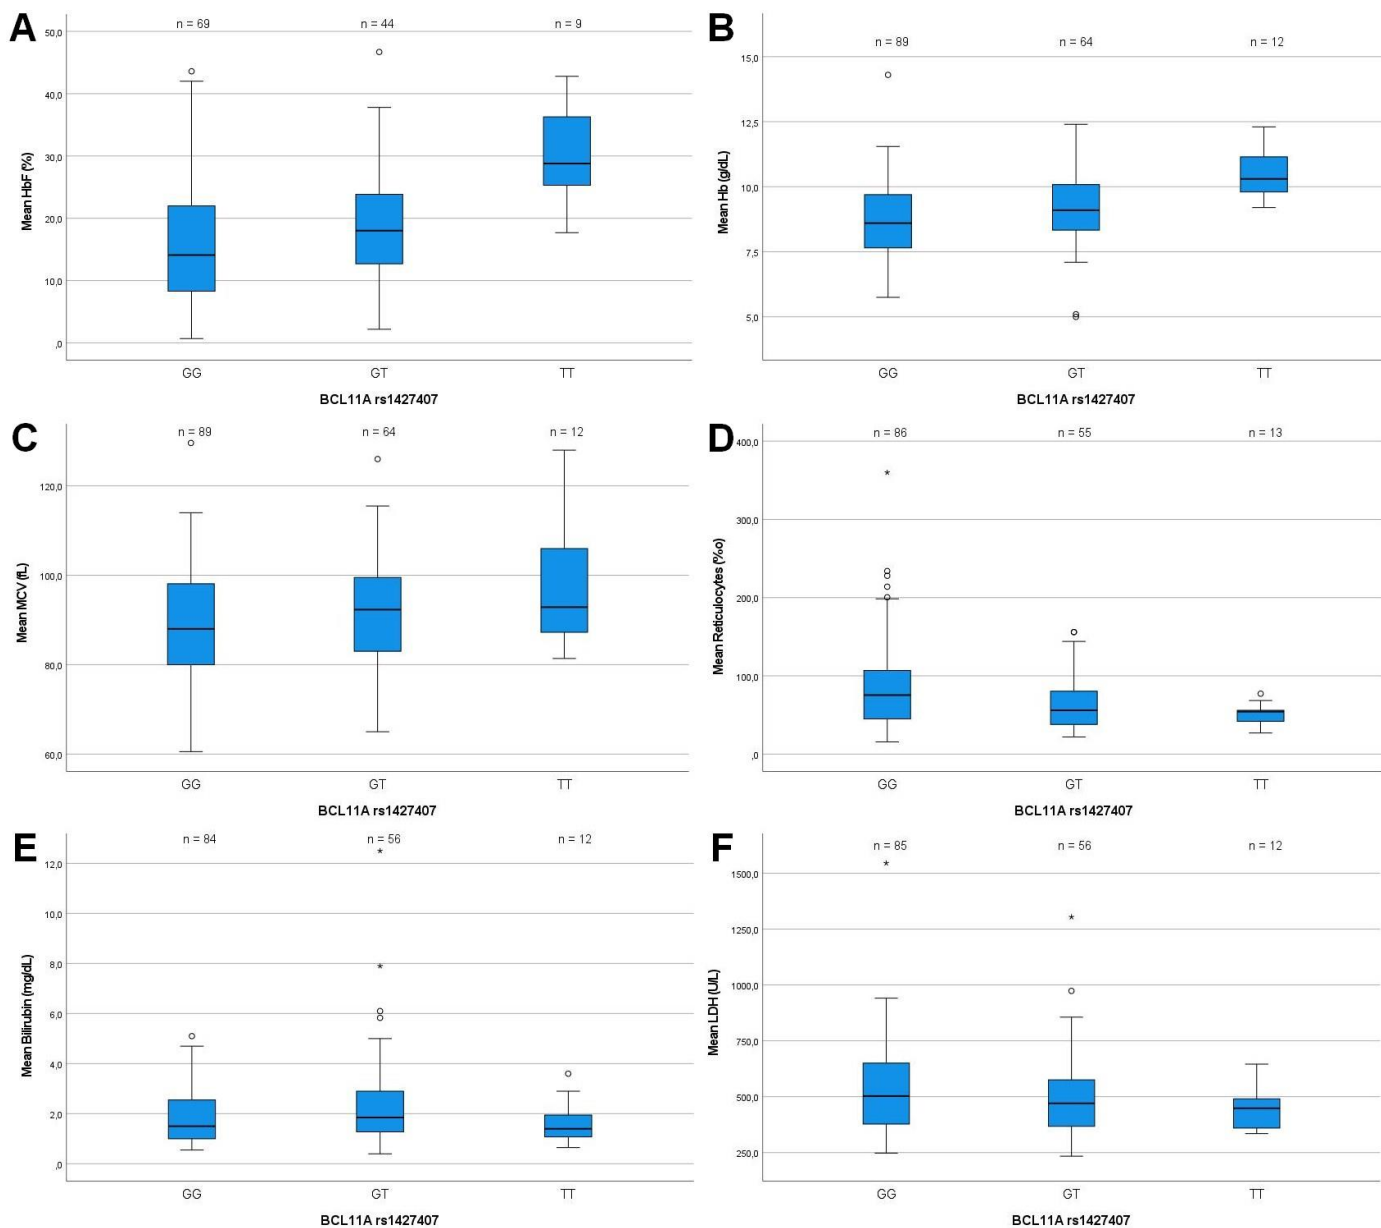

### Supplemental Figure 5

**Frequency of complications in patients with *BCL11A* rs1427407 GG compared to *BCL11A* rs1427407 GT and *BCL11A* rs1427407 TT.** n- number of patients available for analysis (A) GG patients (n=88) mean frequency of hospitalizations  $0.9 \pm 1.5$  per year vs GT patients (n=62) mean frequency of hospitalizations  $1 \pm 1.8$  per year vs TT patients (n=12) mean frequency of hospitalizations  $1.1 \pm 2.1$  per year. (B) GG patients (n=90) mean frequency of red blood cells transfusions  $0.3 \pm 1.1$  per year vs GT patients (n=62) mean frequency of red blood cells transfusions  $0.5 \pm 1.4$  per year vs TT patients (n=12) mean frequency of red blood cells transfusions  $0 \pm 0$  per year. (C) GG patients (n=89) mean frequency of pain crises  $0.7 \pm 1.2$  per year vs GT patients (n=62) mean frequency of pain crises  $0.9 \pm 1.6$  per year vs TT patients (n=12) mean frequency of pain crises  $1.1 \pm 2$  per year. (D) GG patients (n=89) mean frequency of acute chest syndromes  $0.1 \pm 0.4$  per year vs GT patients (n=63) mean frequency of acute chest syndromes  $0.1 \pm 0.2$  per year vs TT patients (n=12) mean frequency of acute chest syndromes  $0.1 \pm 0.3$  per year.

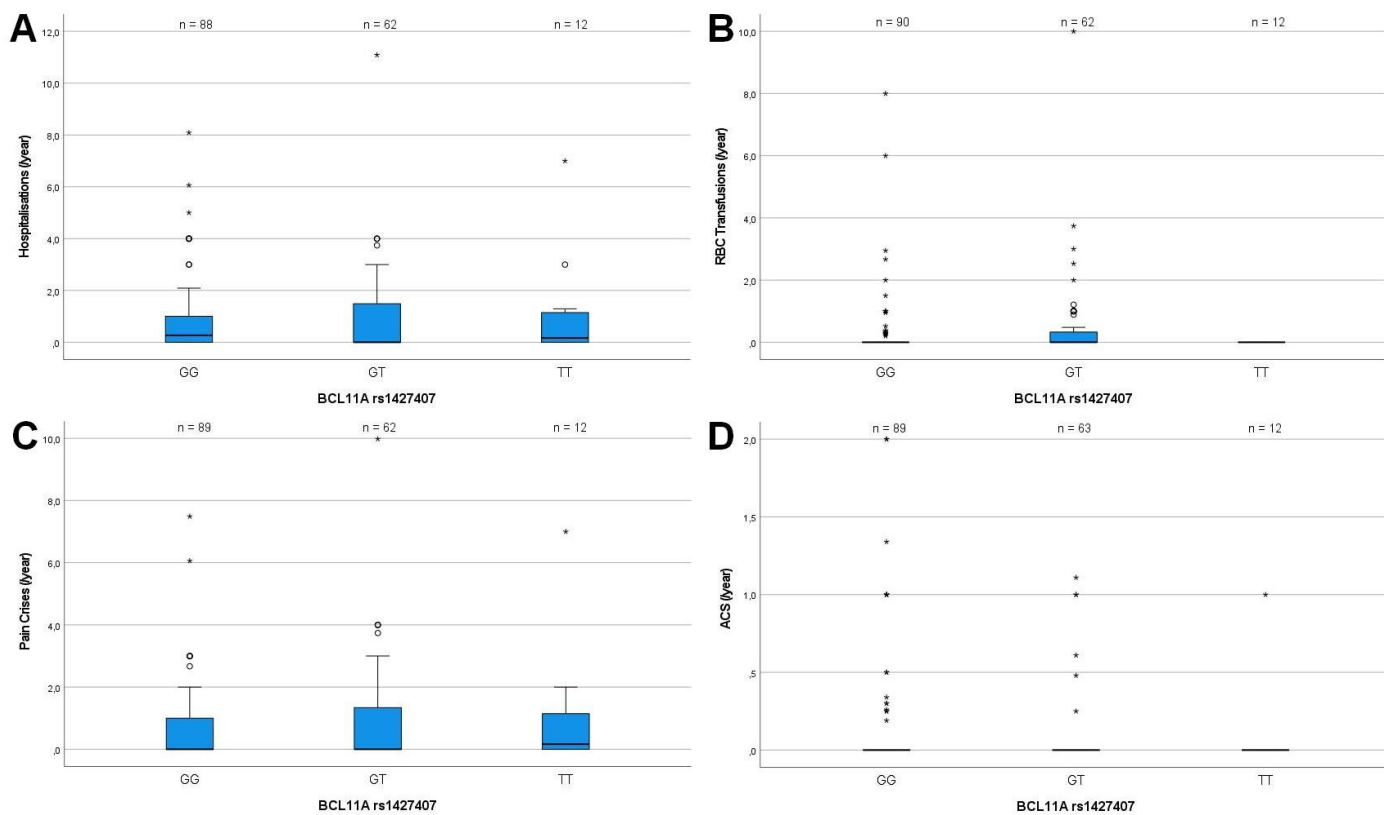

## Supplemental Figure 6

### Laboratory parameters of patients with *BCL11A* rs7606173 CC compared to *BCL11A* rs7606173 CG and *BCL11A* rs7606173 GG.

n- number of patients available for analysis (A) CC patients (n=22) mean HbF  $17 \pm 10.4$  % vs CG patients (n=60) mean HbF  $17.5 \pm 9$  % vs GG patients (n=40) mean HbF  $19.7 \pm 10.6$  %. (B) CC patients (n=33) mean Hb  $8.7 \pm 1.8$  g/dL vs CG patients (n=81) mean Hb  $9 \pm 1.5$  g/dL vs GG patients (n=51) mean Hb  $9.3 \pm 1.4$  g/dL. (C) CC patients (n=33) mean MCV  $88.6 \pm 12.8$  fL vs CG patients (n=81) mean MCV  $91.4 \pm 13.3$  fL vs GG patients (n=51) mean MCV  $89.7 \pm 12.5$  fL. (D) CC patients (n=32) mean reticulocytes  $92.1 \pm 66.5$  % vs CG patients (n=74) mean reticulocytes  $77.3 \pm 46.3$  % vs GG patients (n=48) mean reticulocytes  $61 \pm 30.4$  %. (E) CC patients (n=31) mean bilirubin  $1.7 \pm 0.9$  mg/dL vs CG patients (n=75) mean bilirubin  $2.1 \pm 1.2$  mg/dL vs GG patients (n=46) mean bilirubin  $2.3 \pm 2.2$  mg/dL. (F) CC patients (n=32) mean LDH  $503.4 \pm 176.9$  U/L vs CG patients (n=74) mean LDH  $479.8 \pm 148.8$  U/L vs GG patients (n=47) mean LDH  $555.1 \pm 238.2$  U/L.

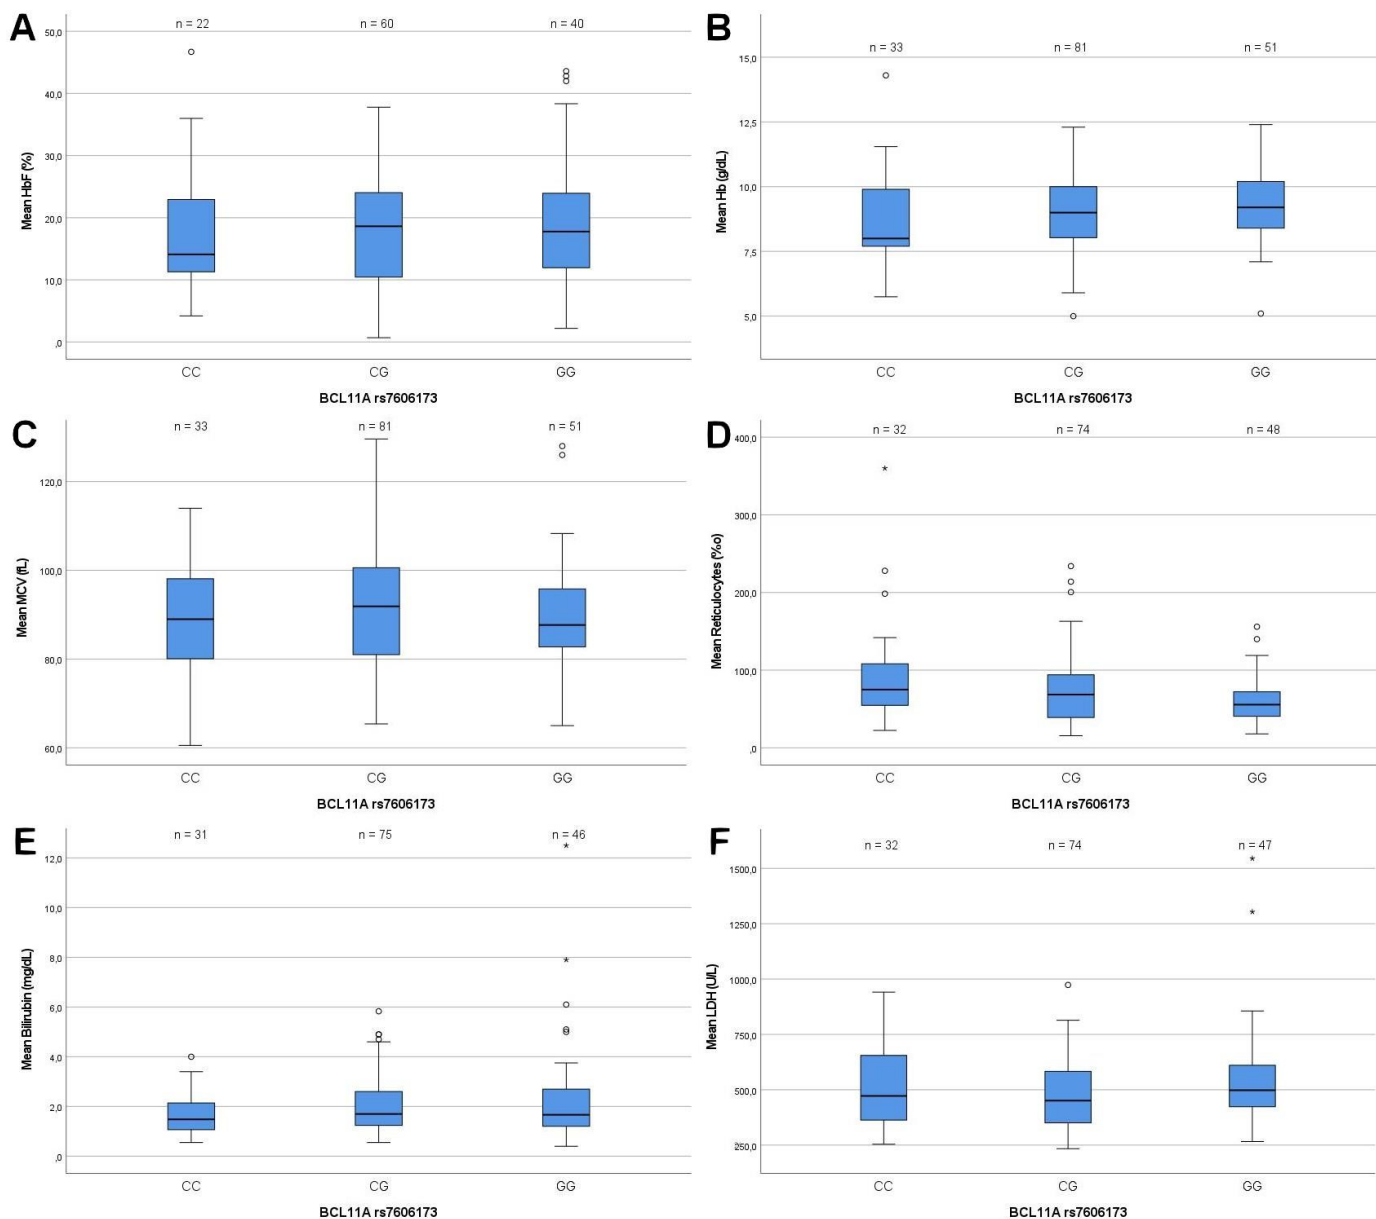

### Supplemental Figure 7

#### Frequency of complications in patients with *BCL11A* rs7606173 CC compared to *BCL11A* rs7606173 CG and *BCL11A* rs7606173 GG.

n- number of patients available for analysis (A) CC patients (n=35) mean frequency of hospitalizations  $0.8 \pm 1.4$  per year vs CG patients (n=76) mean frequency of hospitalizations  $1.1 \pm 1.9$  per year vs GG patients (n=51) mean frequency of hospitalizations  $1 \pm 1.3$  per year. (B) CC patients (n=36) mean frequency of red blood cells transfusions  $0.6 \pm 1.8$  per year vs CG patients (n=76) mean frequency of red blood cells transfusions  $0.3 \pm 1.2$  per year vs GG patients (n=52) mean frequency of red blood cells transfusions  $0.3 \pm 0.6$  per year. (C) CC patients (n=36) mean frequency of pain crises  $0.7 \pm 1.3$  per year vs CG patients (n=76) mean frequency of pain crises  $0.9 \pm 1.7$  per year vs GG patients (n=51) mean frequency of pain crises  $0.8 \pm 1.1$  per year. (D) CC patients (n=35) mean frequency of acute chest syndromes  $0.1 \pm 0.3$  per year vs CG patients (n=77) mean frequency of acute chest syndromes  $0.1 \pm 0.3$  per year vs GG patients (n=52) mean frequency of acute chest syndromes  $0.1 \pm 0.4$  per year.

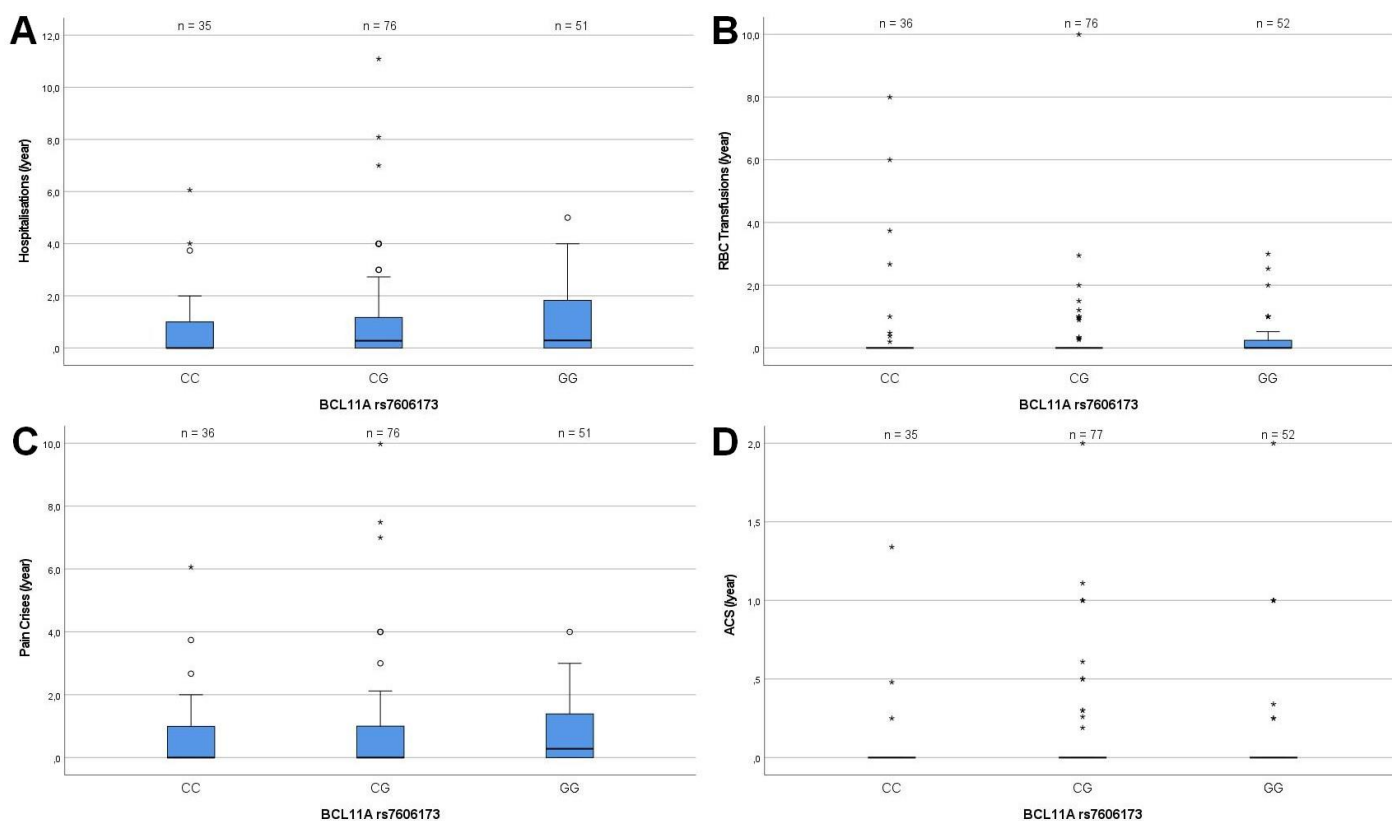



## Supplemental Figure 8

**Laboratory parameters of patients with *HBG2* rs7482144 wildtype (GG) compared to rs7482144 GA and rs7482144 AA.** n- number of patients available for analysis (A) wildtype patients (n=105) mean HbF  $17.5 \pm 10$  % vs heterozygous patients (n=7) mean HbF  $20.9 \pm 7.5$  % vs homozygous patients (n=17) mean HbF  $24.7 \pm 9$  %. (B) wildtype patients (n=143) mean Hb  $8.9 \pm 1.5$  g/dL vs heterozygous patients (n=12) mean Hb  $9.8 \pm 0.9$  g/dL vs homozygous patients (n=17) mean Hb  $10.3 \pm 1.5$  g/dL. (C) wildtype patients (n=143) mean MCV  $90.3 \pm 13$  fL vs heterozygous patients (n=12) mean MCV  $92.5 \pm 10.6$  fL vs homozygous patients (n=17) mean MCV  $94.1 \pm 14.2$  fL. (D) wildtype patients (n=134) mean Reticulocytes  $75.6 \pm 48.1$  ‰ vs heterozygous patients (n=10) mean Reticulocytes  $63.5 \pm 30.2$  ‰ vs homozygous patients (n=17) mean Reticulocytes  $70.4 \pm 52.4$  ‰. (E) wildtype patients (n=131) mean bilirubin  $2.1 \pm 1.6$  mg/dL vs heterozygous patients (n=11) mean bilirubin  $1.7 \pm 0.8$  mg/dL vs homozygous patients (n=17) mean bilirubin  $2 \pm 1.3$  mg/dL. (F) wildtype patients (n=132) mean LDH  $516.5 \pm 194.2$  U/L vs heterozygous patients (n=11) mean LDH  $490.7 \pm 145.9$  U/L vs homozygous patients (n=17) mean LDH  $426.3 \pm 95.6$  U/L.

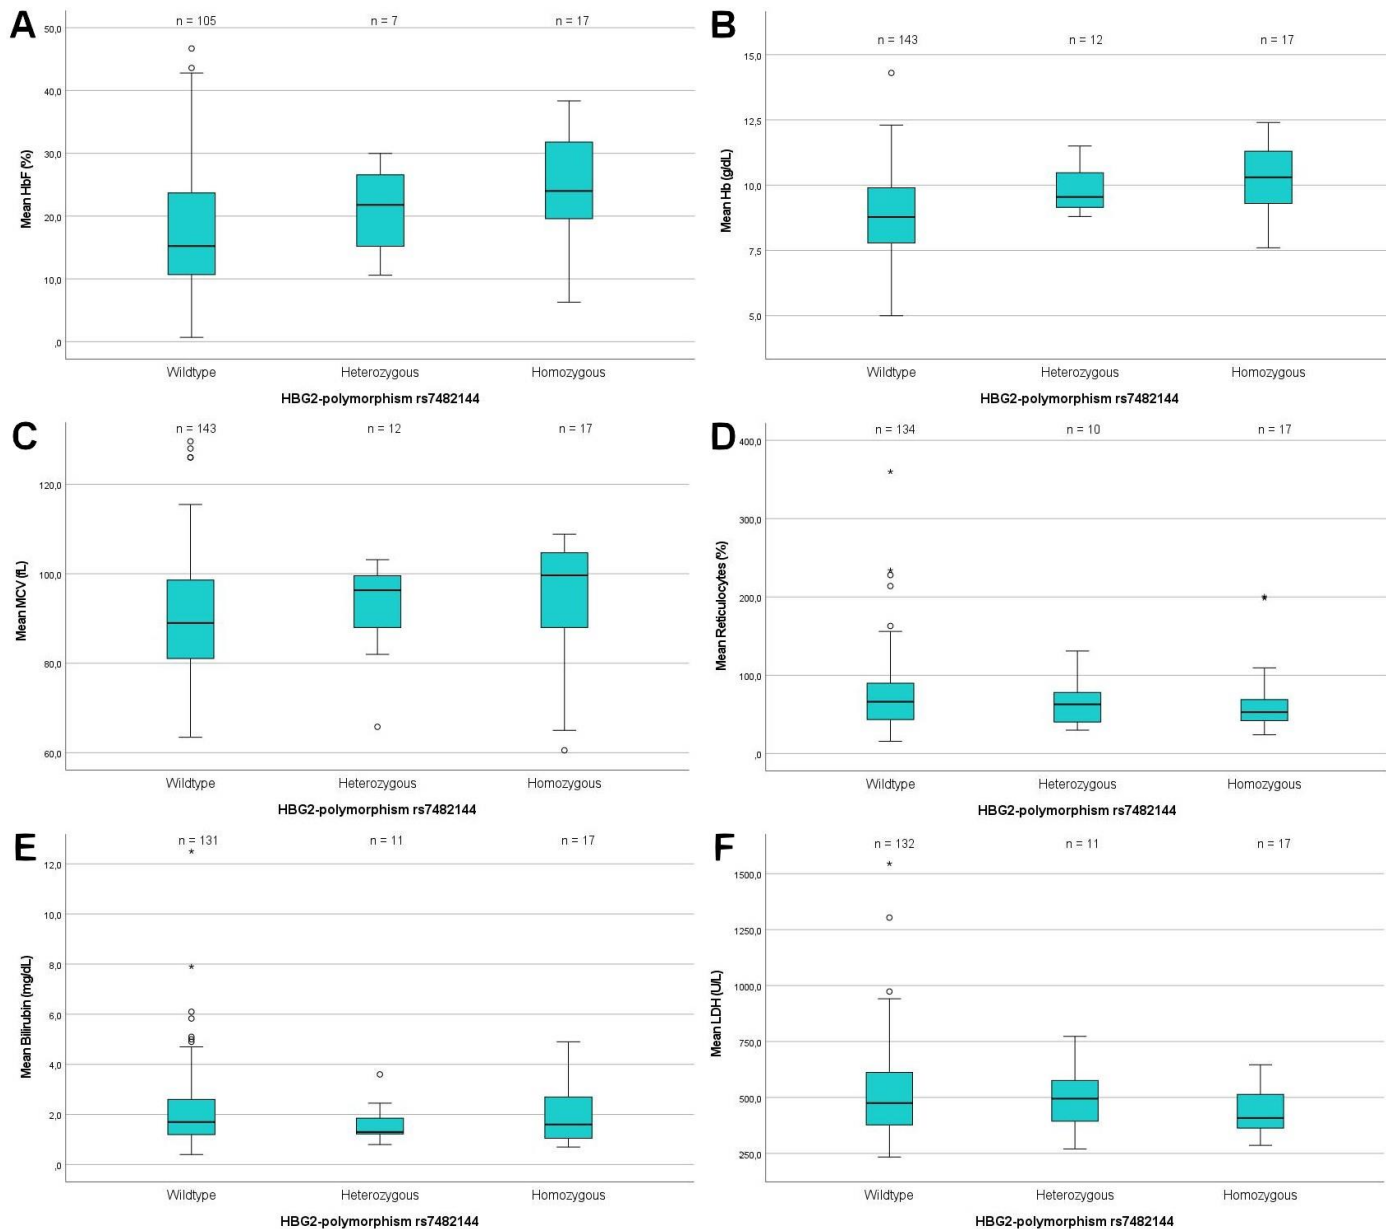

## Supplemental Figure 9

**Frequency of complications in patients with *HBG2* rs7482144 wildtype (GG) compared to rs7482144 GA and rs7482144 AA.** n- number of patients available for analysis (A) wildtype patients (n=142) mean frequency of hospitalizations  $0.8 \pm 1.3$  per year vs heterozygous patients (n=9) mean frequency of hospitalizations  $0.8 \pm 0.8$  per year vs homozygous patients (n=18) mean frequency of hospitalizations  $2.4 \pm 3$  per year. (B) wildtype patients (n=143) mean frequency of red blood cells transfusions  $0.4 \pm 1.3$  per year vs heterozygous patients (n=10) mean frequency of red blood cells transfusions  $0.1 \pm 0.3$  per year vs homozygous patients (n=18) mean frequency of red blood cells transfusions  $0.1 \pm 0.5$  per year. (C) wildtype patients (n=143) mean frequency of pain crises  $0.6 \pm 1.1$  per year vs heterozygous patients (n=9) mean frequency of pain crises  $0.7 \pm 0.7$  per year vs homozygous patients (n=18) mean frequency of pain crises  $2.2 \pm 2.9$  per year. (D) wildtype patients (n=143) mean frequency of acute chest syndromes  $0.1 \pm 0.3$  per year vs heterozygous patients (n=10) mean frequency of acute chest syndromes  $0.1 \pm 0.3$  per year vs homozygous patients (n=18) mean frequency of acute chest syndromes  $0.2 \pm 0.4$  per year.

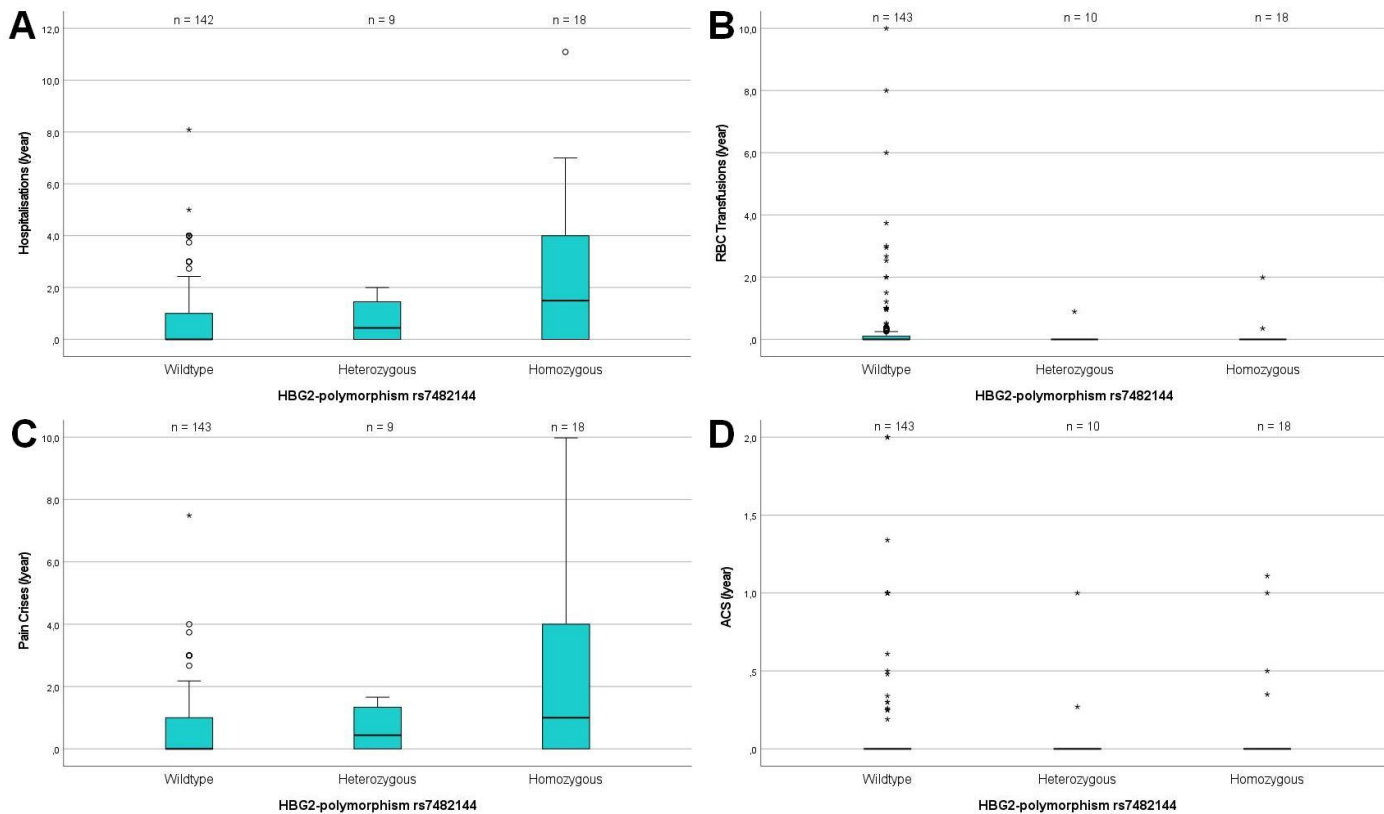

## Supplemental Figure 10

**Laboratory parameters of patients with *HMIP* rs66650371 wildtype compared to heterozygous *HMIP* rs66650371 delCTA and homozygous *HMIP* rs66650371 delCTA.** n- number of patients available for analysis (A) wildtype patients (n=112) mean HbF  $17.5 \pm 9.6$  % vs heterozygous patients (n=9) mean HbF  $24.8 \pm 9.4$  % vs homozygous patients (n=3) mean HbF  $28 \pm 7.9$  %. (B) wildtype patients (n=147) mean Hb  $9 \pm 1.5$  g/dL vs heterozygous patients (n=15) mean Hb  $9.7 \pm 1.4$  g/dL vs homozygous patients (n=5) mean Hb  $9.7 \pm 2.1$  g/dL. (C) wildtype patients (n=147) mean MCV  $90 \pm 13.1$  fL vs heterozygous patients (n=15) mean MCV  $90.8 \pm 11.6$  fL vs homozygous patients (n=5) mean MCV  $99.1 \pm 10.4$  fL. (D) wildtype patients (n=136) mean reticulocytes  $78.2 \pm 49.5$  ‰ vs heterozygous patients (n=15) mean reticulocytes  $57 \pm 32$  ‰ vs homozygous patients (n=5) mean reticulocytes  $54.1 \pm 38.8$  ‰. (E) wildtype patients (n=135) mean bilirubin  $2.2 \pm 1.5$  mg/dL vs heterozygous patients (n=14) mean bilirubin  $1.5 \pm 1$  mg/dL vs homozygous patients (n=5) mean bilirubin  $1.3 \pm 0.8$  mg/dL. (F) wildtype patients (n=136) mean LDH  $519.2 \pm 188.9$  U/L vs heterozygous patients (n=14) mean LDH  $418.6 \pm 151.4$  U/L vs homozygous patients (n=5) mean LDH  $436.5 \pm 159$  U/L

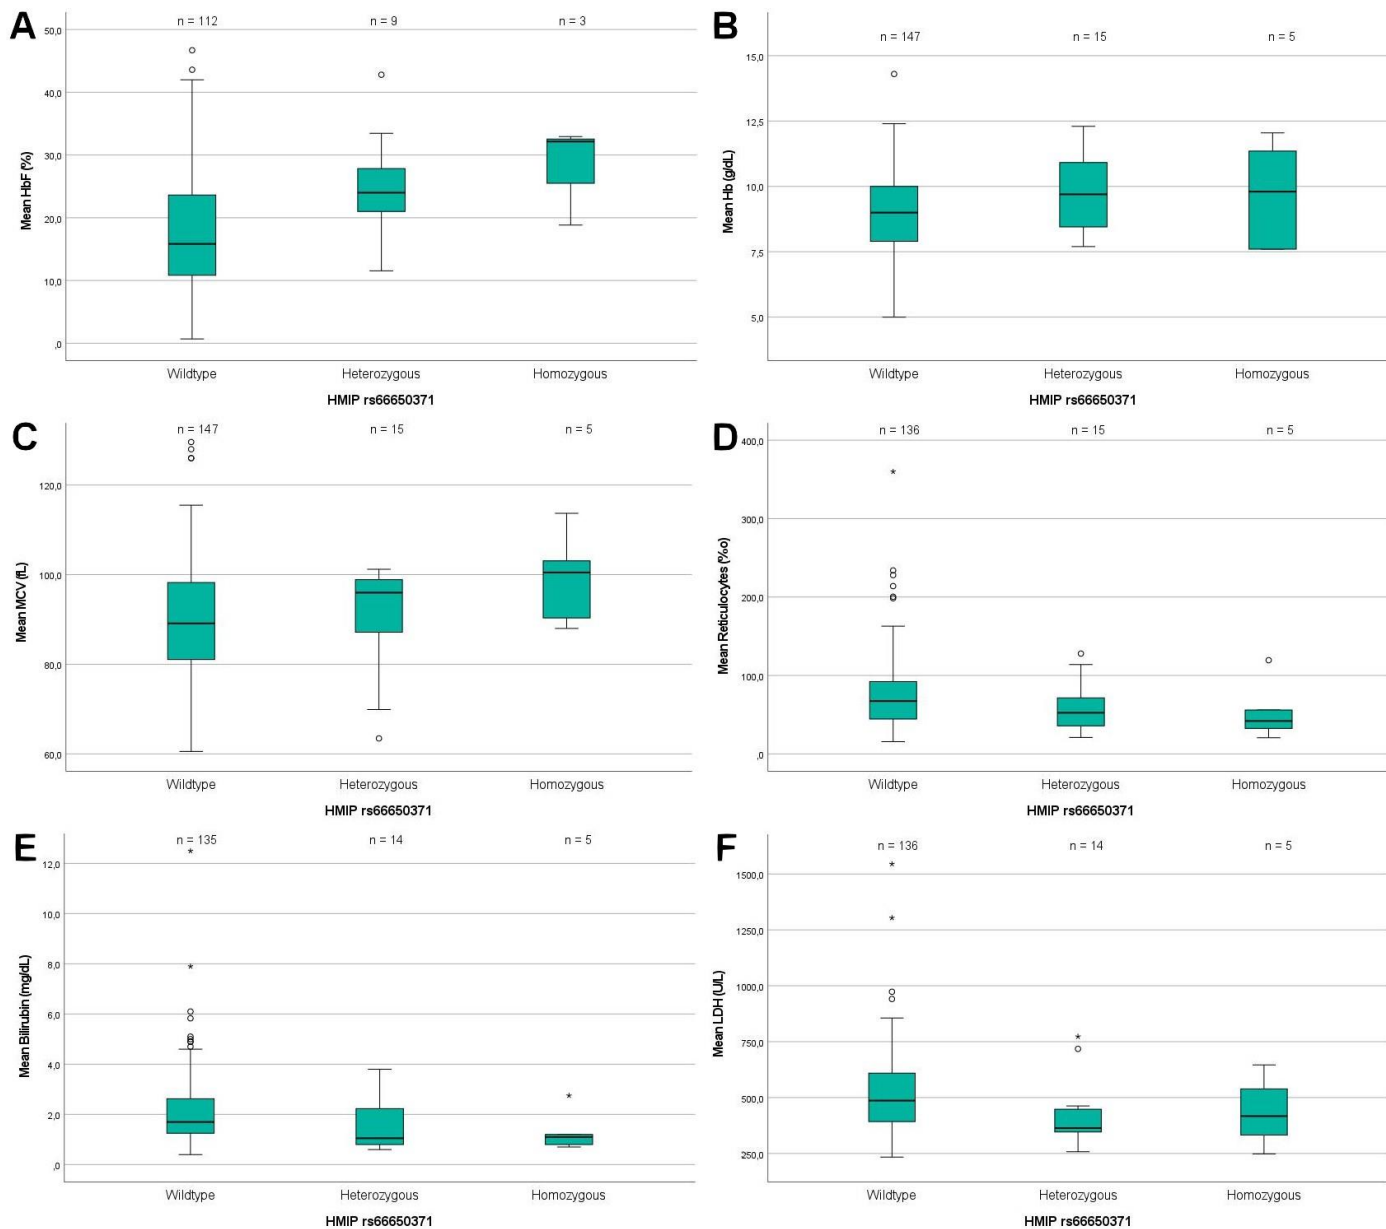

### Supplemental Figure 11

**Frequency of complications in patients with *HMIP* rs66650371 wildtype compared to heterozygous *HMIP* rs66650371 delCTA and homozygous *HMIP* rs66650371 delCTA.** n- number of patients available for analysis (A) wildtype patients (n=144) mean frequency of hospitalizations  $1 \pm 1.5$  per year vs heterozygous patients (n=15) mean frequency of hospitalizations  $1.3 \pm 2.9$  per year vs homozygous patients (n=5) mean frequency of hospitalizations  $0.9 \pm 1.3$  per year. (B) wildtype patients (n=146) mean frequency of red blood cells transfusions  $0.4 \pm 1.3$  per year vs heterozygous patients (n=15) mean frequency of red blood cells transfusions  $0.1 \pm 0.3$  per year vs homozygous patients (n=5) mean frequency of red blood cells transfusions  $0.4 \pm 0.8$  per year. (C) wildtype patients (n=145) mean frequency of pain crises  $0.8 \pm 1.3$  per year vs heterozygous patients (n=15) mean frequency of pain crises  $1.2 \pm 2.7$  per year vs homozygous patients (n=5) mean frequency of pain crises  $0.6 \pm 0.8$  per year. (D) wildtype patients (n=146) mean frequency of acute chest syndromes  $0.1 \pm 0.3$  per year vs heterozygous patients (n=15) mean frequency of acute chest syndromes  $0.1 \pm 0.4$  per year vs homozygous patients (n=5) mean frequency of acute chest syndromes  $0.3 \pm 0.6$  per year.

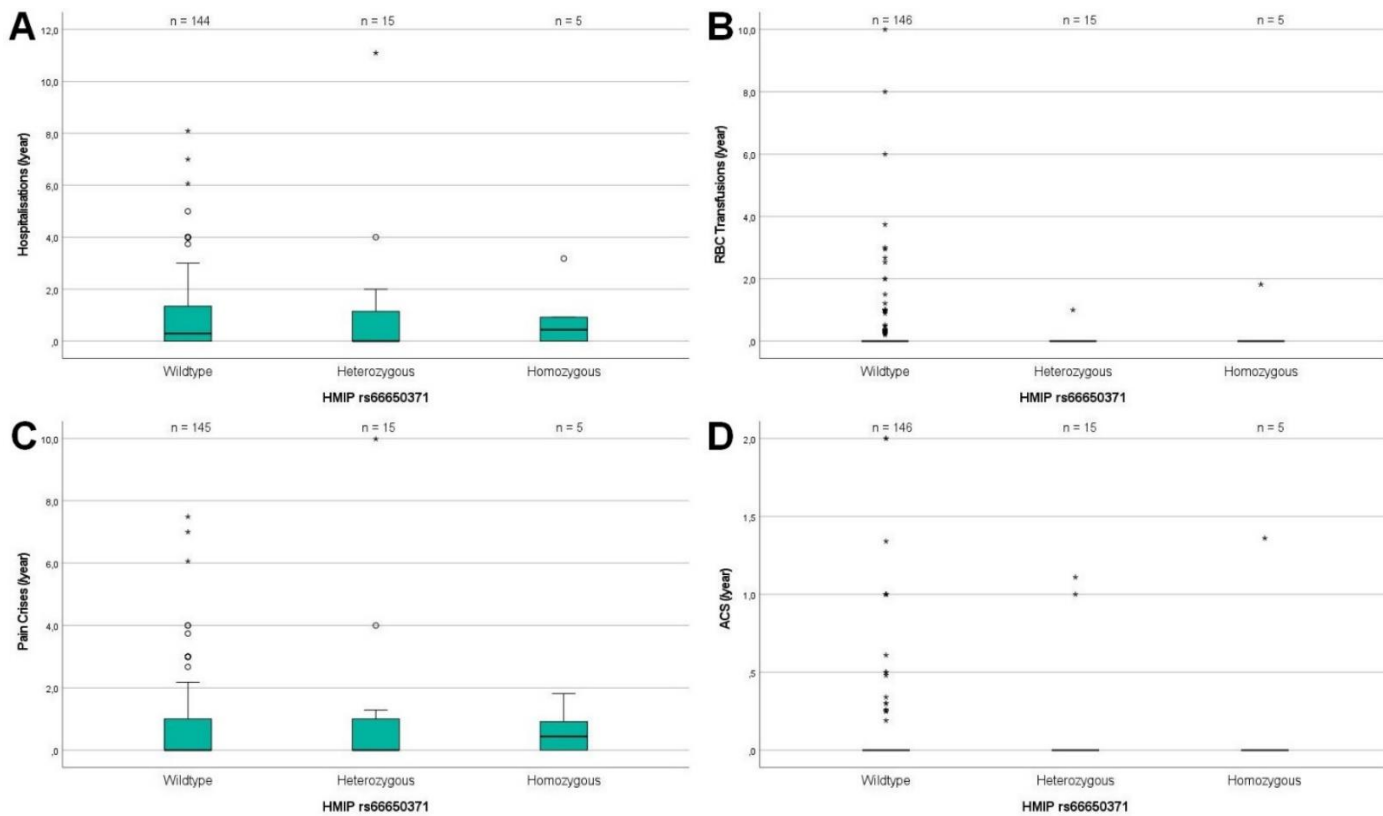

### Supplemental Figure 12

**Fetal hemoglobin while on hydroxyurea by number of HbF-inducing alleles.** n- number of patients available for analysis; HbF-inducing alleles BCL11A rs1427407 T, HMIP rs66650371 delCTA and HBG2 rs7482144 A

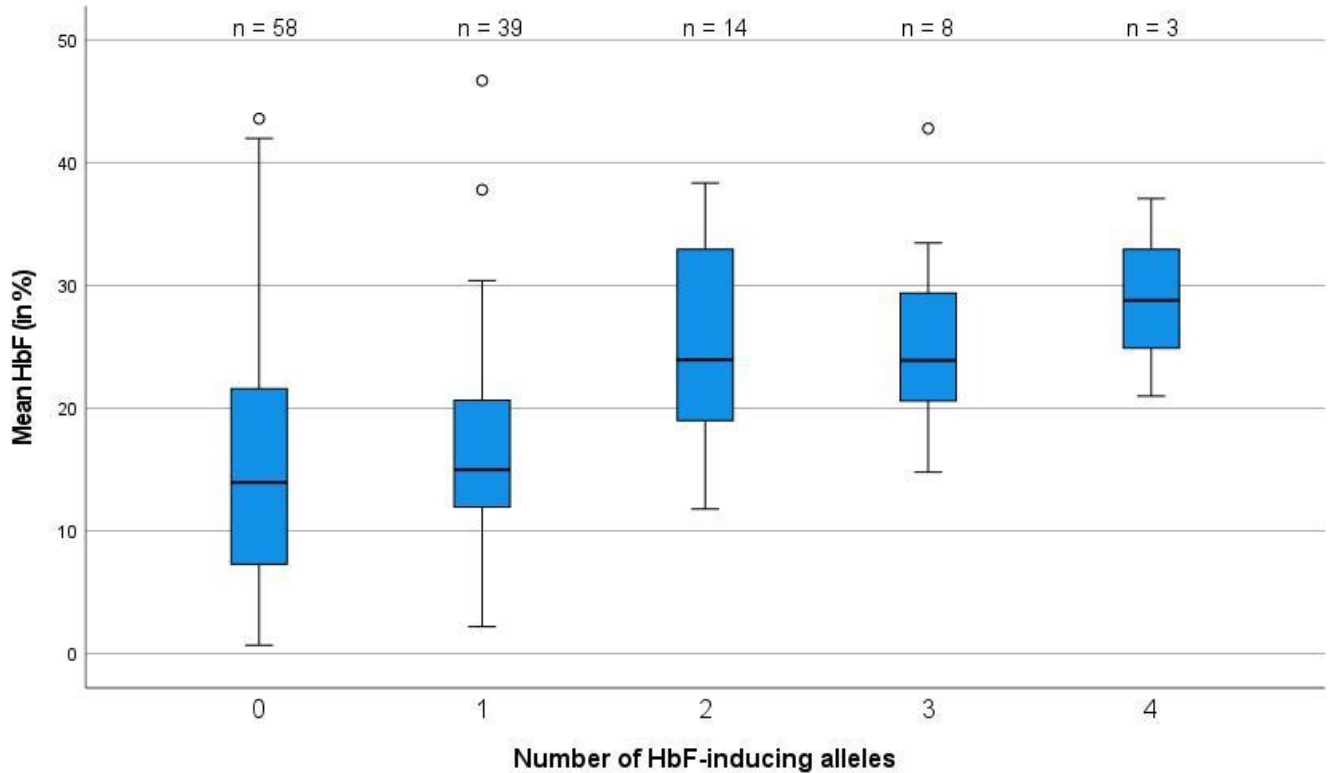

### Supplemental Figure 13

**Mean values of laboratory parameters and complications of  $\gamma$ -globin promoter polymorphism rs7482144-negative patients compared to the  $\gamma$ -globin promoter polymorphism rs7482144-positive patients by region of origins.** (A) Negative patients from Rest of the World (n=5): mean HbF  $21 \pm$  SD 11.2 %, negative patients from Subsaharan Africa (n= 78): mean HbF  $17.7 \pm$  SD 9.8 %, negative patients from Middle Sea (n=14): mean HbF  $19.6 \pm$  SD 11.1 %, ANOVA  $p=0.654$  vs positive patients from Rest of the World (n=8): mean HbF  $25.5 \pm$  SD 7.2 %, positive patients from Subsaharan Africa (n= 12): mean HbF  $23.3 \pm$  SD 9.4 %, positive patients from Middle Sea (n=4): mean HbF  $20.7 \pm$  SD 9.9 %, ANOVA  $p=0.669$ . (B) Negative patients from Rest of the World (n=6): mean Hb  $9.2 \pm$  SD 1.7 g/dL, negative patients from Subsaharan Africa (n=107): mean Hb  $8.9 \pm$  SD 1.4 g/dL, negative patients from Middle Sea (n=20): mean Hb  $9.3 \pm$  SD 1.5 g/dL, ANOVA  $p=0.425$  vs positive patients from Rest of the World (n=9): mean Hb  $10.6 \pm$  SD 1.2 g/dL, positive patients from Subsaharan Africa (n=14): mean Hb  $9.8 \pm$  SD 1.4 g/dL, positive patients from Middle Sea (n=5): mean Hb  $10.2 \pm$  SD 0.9 g/dL, ANOVA  $p=0.439$  (C) Negative patients from Rest of the World (n=7): mean frequency of hospitalizations per year  $1.2 \pm$  SD 1.4, negative patients from Subsaharan Africa (n=104): mean frequency of hospitalizations per year  $0.7 \pm$  SD 1.3, negative patients from Middle Sea (n=20): mean frequency of hospitalizations per year  $0.7 \pm$  SD 1, ANOVA  $p=0.558$  vs positive patients from Rest of the World (n=9): mean frequency of hospitalizations per year  $2.7 \pm$  SD 3.5, positive patients from Subsaharan Africa (n=12): mean frequency of hospitalizations per year  $1.8 \pm$  SD 2.4, positive patients from Middle Sea (n=5): mean frequency of hospitalizations per year  $1.0 \pm$

SD 1.0, ANOVA  $p=0.533$ . (D) Negative patients from Rest of the World ( $n=7$ ): mean frequency of pain crises per year  $1.2 \pm$  SD 1.4, negative patients from Subsaharan Africa ( $n=105$ ): mean frequency of pain crises per year  $0.6 \pm$  SD 1.1, negative patients from Middle Sea ( $n=20$ ): mean frequency of pain crises per year  $0.5 \pm$  SD 0.8, ANOVA  $p=0.238$  vs positive patients from Rest of the World ( $n=9$ ): mean frequency of pain crises per year  $2.5 \pm$  SD 3.2, positive patients from Subsaharan Africa ( $n=12$ ): mean frequency of pain crises per year  $1.7 \pm$  SD 2.4, positive patients from Middle Sea ( $n=5$ ): mean frequency of pain crises per year  $0.5 \pm$  SD 0.5, ANOVA  $p=0.384$ .

Hb – total hemoglobin; HbF – fetal hemoglobin; SD – standard deviation

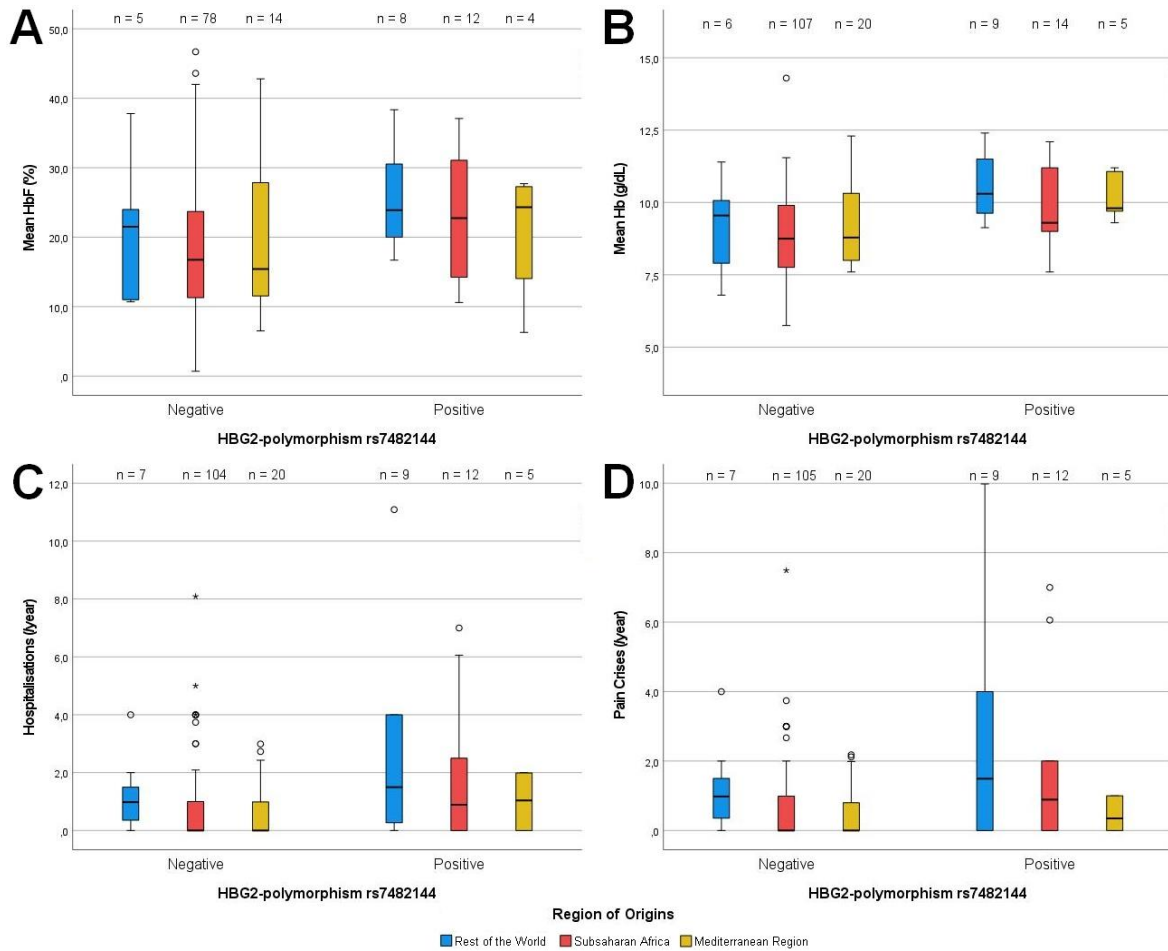

**Supplemental Table 1**

**Distribution of the polymorphisms and minor allele frequency (MAF) by regions of origin**

| Polymorphism                   |              | n <sub>Sub-Saharan</sub> | % <sub>Sub-Saharan</sub> | n <sub>RoW*</sub> | % <sub>RoW*</sub> | n <sub>Mediterranean</sub> | % <sub>Mediterranean-</sub> | n <sub>All**</sub> | % <sub>All**</sub> |
|--------------------------------|--------------|--------------------------|--------------------------|-------------------|-------------------|----------------------------|-----------------------------|--------------------|--------------------|
|                                |              | Africa                   | Africa                   |                   |                   | Sea                        | Sea                         |                    |                    |
| α-Globin-Deletions             | 0            | 150                      | 57.7                     | 17                | 77.3              | 51                         | 91.1                        | 243                | 65.2               |
|                                | 1            | 89                       | 34.2                     | 5                 | 22.7              | 4                          | 7.1                         | 107                | 28.7               |
|                                | 2            | 21                       | 8.1                      | 0                 | 0                 | 1                          | 1.8                         | 23                 | 6.2                |
|                                | all          | 260                      | 100                      | 22                | 100               | 56                         | 100                         | 373                | 100                |
| <i>BCL11A</i> rs1427407        | GG           | 102                      | 61.1                     | 4                 | 26.7              | 16                         | 55.2                        | 135                | 56.7               |
|                                | GT           | 56                       | 33.5                     | 11                | 73.3              | 10                         | 34.5                        | 88                 | 37                 |
|                                | TT           | 9                        | 5.4                      | 0                 | 0                 | 3                          | 10.3                        | 15                 | 6.3                |
|                                | all          | 167                      | 100                      | 15                | 100               | 29                         | 100                         | 238                | 100                |
|                                | MAF***       | 0.22                     |                          | 0.37              |                   | 0.28                       |                             | 0.25               |                    |
| <i>BCL11A</i> rs7606173        | CC           | 36                       | 21.6                     | 0                 | 0                 | 7                          | 24.1                        | 47                 | 19.8               |
|                                | CG           | 84                       | 50.3                     | 9                 | 60                | 11                         | 37.9                        | 117                | 49.2               |
|                                | GG           | 47                       | 28.1                     | 6                 | 40                | 11                         | 37.9                        | 74                 | 31.1               |
|                                | all          | 167                      | 100                      | 15                | 100               | 29                         | 100                         | 238                | 100                |
|                                | MAF***       | 0.53                     |                          | 0.7               |                   | 0.57                       |                             | 0.56               |                    |
| γ-Globin <i>XmnI</i> rs7482144 | Wildtype     | 149                      | 88.2                     | 7                 | 41.2              | 27                         | 84.4                        | 207                | 84.5               |
|                                | Heterozygous | 7                        | 4.1                      | 4                 | 23.5              | 2                          | 6.2                         | 14                 | 5.7                |
|                                | Homozygous   | 13                       | 7.7                      | 6                 | 35.3              | 3                          | 9.4                         | 24                 | 9.8                |
|                                | all          | 169                      | 100                      | 17                | 100               | 32                         | 100                         | 245                | 100                |
|                                | MAF***       | 0.1                      |                          | 0.47              |                   | 0.13                       |                             | 0.13               |                    |
| <i>HMIP</i> rs66650371 3bp del | Wildtype     | 158                      | 94                       | 12                | 80                | 16                         | 53.3                        | 211                | 87.9               |
|                                | Heterozygous | 8                        | 4.8                      | 3                 | 20                | 11                         | 36.7                        | 23                 | 9.6                |
|                                | Homozygous   | 2                        | 1.2                      | 0                 | 0                 | 3                          | 10                          | 6                  | 2.5                |
|                                | all          | 168                      | 100                      | 15                | 100               | 30                         | 100                         | 240                | 100                |
|                                | MAF***       | 0.04                     |                          | 0.1               |                   | 0.28                       |                             | 0.07               |                    |

\* RoW: rest of the world (Iraq n=13, all others n≤2); \*\* includes patients with unknown region of origin; \*\*\* Minor allele frequency

## Supplemental Table 2

**Patient characteristics by region of origin.** A Welch-ANOVA test pointed at significant differences in the mean values of fetal hemoglobin, of total hemoglobin and of MCV in patients from different regions of origin. The Games-Howell post-hoc analysis that corrects for multiple testing confirmed a significant difference for fetal hemoglobin and MCV, but did not reach significance for total hemoglobin (p=0.057).

|                                                        |                       | <b>Sub-Saharan Africa</b> | <b>Mediterranean Region</b> | <b>Rest of the World*</b> |
|--------------------------------------------------------|-----------------------|---------------------------|-----------------------------|---------------------------|
| <b>Sex (female/male)</b>                               |                       | 145 / 140                 | 33 / 29                     | 12 / 13                   |
| <b>Age at last observation under treatment (years)</b> | <b>Mean +/-SD</b>     | 11.8 ± 8.1                | 13.9 ± 9.1                  | 14.3 ± 10.9               |
|                                                        | <b>10. percentile</b> | 4.3                       | 5.5                         | 4.8                       |
|                                                        | <b>Median</b>         | 10.5                      | 11.8                        | 11.9                      |
|                                                        | <b>90. percentile</b> | 19.5                      | 21.5                        | 24                        |
|                                                        | <b>n</b>              | 226                       | 52                          | 23                        |
|                                                        | <b>Welch-ANOVA</b>    | 1.639                     |                             |                           |
|                                                        | <b>p</b>              | 0.205                     |                             |                           |
| <b>Daily HU dose (mg/kg)</b>                           | <b>Mean +/-SD</b>     | 23.4 ± 5.5                | 22.9 ± 6.7                  | 20.4 ± 6.5                |
|                                                        | <b>10. percentile</b> | 16.5                      | 13.9                        | 11.7                      |
|                                                        | <b>Median</b>         | 22.9                      | 21.6                        | 20.9                      |
|                                                        | <b>90. percentile</b> | 31                        | 32.1                        | 27.8                      |
|                                                        | <b>n</b>              | 217                       | 50                          | 21                        |
|                                                        | <b>Welch-ANOVA</b>    | 2.011                     |                             |                           |
|                                                        | <b>p</b>              | 0.146                     |                             |                           |
| <b>HU therapy duration (months)**</b>                  | <b>Mean +/-SD</b>     | 35.9 ± 29                 | 44.9 ± 42.8                 | 28.1 ± 22.2               |
|                                                        | <b>10. percentile</b> | 6.4                       | 10.1                        | 11                        |
|                                                        | <b>Median</b>         | 28                        | 32                          | 23                        |
|                                                        | <b>90. percentile</b> | 80.2                      | 97.5                        | 52.5                      |
|                                                        | <b>n</b>              | 209                       | 47                          | 21                        |
|                                                        | <b>Welch-ANOVA</b>    | 2.263                     |                             |                           |
|                                                        | <b>p</b>              | 0.115                     |                             |                           |
| <b>Fetal hemoglobin in patients on HU (%)</b>          | <b>Mean +/-SD</b>     | 17.7 ± 9.5                | 19.4 ± 8.9                  | 23.8 ± 7.9                |
|                                                        | <b>10. percentile</b> | 5.5                       | 7.2                         | 13.9                      |
|                                                        | <b>Median</b>         | 16.2                      | 20.7                        | 23.5                      |
|                                                        | <b>90. percentile</b> | 30.3                      | 27.9                        | 34.8                      |
|                                                        | <b>n</b>              | 144                       | 31                          | 16                        |
|                                                        | <b>Welch-ANOVA</b>    | <b>4.227</b>              |                             |                           |
|                                                        | <b>p</b>              | <b>0.023</b>              |                             |                           |
| <b>Hemoglobin in patients on HU (g/dL)</b>             | <b>Mean +/-SD</b>     | 8.9 ± 1.4                 | 9.5 ± 1.5                   | 9.4 ± 1.8                 |
|                                                        | <b>10. percentile</b> | 7.1                       | 7.7                         | 7.1                       |
|                                                        | <b>Median</b>         | 8.9                       | 9.5                         | 9.5                       |
|                                                        | <b>90. percentile</b> | 10.8                      | 11.3                        | 11.6                      |
|                                                        | <b>n</b>              | 207                       | 46                          | 20                        |
|                                                        | <b>Welch-ANOVA</b>    | <b>3.257</b>              |                             |                           |
|                                                        | <b>p</b>              | <b>0.049</b>              |                             |                           |
| <b>MCV in patients on HU (fL)</b>                      | <b>Mean +/-SD</b>     | 90.9 ± 13.9               | 97.9 ± 12.3                 | 95.4 ± 9.6                |
|                                                        | <b>10. percentile</b> | 73.9                      | 84.5                        | 84.4                      |
|                                                        | <b>Median</b>         | 89.1                      | 98.4                        | 96.6                      |



|                                             |                       |               |               |               |
|---------------------------------------------|-----------------------|---------------|---------------|---------------|
|                                             | <b>90. percentile</b> | 108.4         | 112.5         | 103.6         |
|                                             | <b>n</b>              | 207           | 46            | 20            |
|                                             | <b>Welch-ANOVA</b>    | <b>6.478</b>  |               |               |
|                                             | <b>p</b>              | <b>0.003</b>  |               |               |
| <b>Reticulocytes in patients on HU (%)</b>  | <b>Mean +/-SD</b>     | 77.1 ± 44.6   | 64.7 ± 38.7   | 64.6 ± 54.9   |
|                                             | <b>10. percentile</b> | 31.7          | 25.7          | 26            |
|                                             | <b>Median</b>         | 68.2          | 60            | 48.1          |
|                                             | <b>90. percentile</b> | 127.7         | 110.7         | 140.5         |
|                                             | <b>n</b>              | 194           | 43            | 16            |
|                                             | <b>Welch-ANOVA</b>    | 1.920         |               |               |
|                                             | <b>p</b>              | 0.162         |               |               |
| <b>Bilirubin in patients on HU (mg/dL)</b>  | <b>Mean +/-SD</b>     | 1.9 ± 1       | 1.9 ± 1.4     | 3.2 ± 2.6     |
|                                             | <b>10. percentile</b> | 0.8           | 0.7           | 1.2           |
|                                             | <b>Median</b>         | 1.6           | 1.5           | 2.7           |
|                                             | <b>90. percentile</b> | 3.2           | 3.7           | 5             |
|                                             | <b>n</b>              | 193           | 43            | 19            |
|                                             | <b>Welch-ANOVA</b>    | 2.528         |               |               |
|                                             | <b>p</b>              | 0.094         |               |               |
| <b>LDH in patients on HU (U/L)</b>          | <b>Mean +/-SD</b>     | 517.9 ± 172.1 | 470.5 ± 220.2 | 498.2 ± 205.5 |
|                                             | <b>10. percentile</b> | 318.8         | 284           | 326.7         |
|                                             | <b>Median</b>         | 498           | 434           | 421           |
|                                             | <b>90. percentile</b> | 731.2         | 598.8         | 740.3         |
|                                             | <b>n</b>              | 193           | 43            | 18            |
|                                             | <b>Welch-ANOVA</b>    | 0.9           |               |               |
|                                             | <b>p</b>              | 0.415         |               |               |
| <b>Hospitalizations /year***</b>            | <b>Mean +/-SD</b>     | 0.8 ± 1.3     | 0.7 ± 1.1     | 2 ± 2.5       |
|                                             | <b>10. percentile</b> | 0             | 0             | 0             |
|                                             | <b>Median</b>         | 0             | 0             | 1.2           |
|                                             | <b>90. percentile</b> | 2             | 2.6           | 4             |
|                                             | <b>n</b>              | 204           | 45            | 22            |
|                                             | <b>Welch-ANOVA</b>    | 2.593         |               |               |
|                                             | <b>p</b>              | 0.086         |               |               |
| <b>Red blood cell transfusions /year***</b> | <b>Mean +/-SD</b>     | 0.3 ± 0.9     | 0.4 ± 0.8     | 1.1 ± 2.2     |
|                                             | <b>10. percentile</b> | 0             | 0             | 0             |
|                                             | <b>Median</b>         | 0             | 0             | 0             |
|                                             | <b>90. percentile</b> | 1             | 1.9           | 2.9           |
|                                             | <b>n</b>              | 205           | 44            | 23            |
|                                             | <b>Welch-ANOVA</b>    | 1.799         |               |               |
|                                             | <b>p</b>              | 0.177         |               |               |
| <b>Pain crises /year***</b>                 | <b>Mean +/-SD</b>     | 0.6 ± 1.1     | 0.5 ± 0.8     | 1.8 ± 2.3     |
|                                             | <b>10. percentile</b> | 0             | 0             | 0             |
|                                             | <b>Median</b>         | 0             | 0             | 1             |
|                                             | <b>90. percentile</b> | 2             | 2             | 4             |
|                                             | <b>n</b>              | 205           | 45            | 22            |
|                                             | <b>Welch-ANOVA</b>    | 2.952         |               |               |
|                                             | <b>p</b>              | 0.062         |               |               |
| <b>ACS /year***</b>                         | <b>Mean +/-SD</b>     | 0.1 ± 0.4     | 0.2 ± 0.4     | 0.2 ± 0.4     |
|                                             | <b>10. percentile</b> | 0             | 0             | 0             |
|                                             | <b>Median</b>         | 0             | 0             | 0             |

|  |                       |       |     |     |
|--|-----------------------|-------|-----|-----|
|  | <b>90. percentile</b> | 0.3   | 0.8 | 0.9 |
|  | <b>n</b>              | 205   | 45  | 23  |
|  | <b>Welch-ANOVA</b>    | 0.713 |     |     |
|  | <b>p</b>              | 0.495 |     |     |

SD- standard deviation, n- number of patients available for analysis, HU- Hydroxyurea; ACS- acute chest syndrome

\* Iraq n=13, all others n≤2

\*\* The duration of HU therapy was calculated from the first dose until laboratory controls.

Data points are missing if no laboratory control or weight or date of the first dose was documented.

\*\*\* Clinical events were only evaluated in patients with > 6 months of follow up while on hydroxyurea, age >2 years.

### Supplemental Table 3

**Patient characteristics of patients with severe SCD while on hydroxyurea (HU) compared to patients with non-severe SCD while on hydroxyurea.** n- number of patients available for analysis; SD- standard deviation; t-score of unpaired t-Test or Welch-Test; p- t-Test or Welch-Test; 95% Confidence Intervals

|                                                   |            | n <sup>1</sup> | Mean  | SD   | Mean difference | t-Score                   | p            | 95%-CI        |
|---------------------------------------------------|------------|----------------|-------|------|-----------------|---------------------------|--------------|---------------|
| <b>Age (years)</b>                                | Non-severe | 131            | 11.3  | 6.9  | <b>-2.8</b>     | <b>-2.044<sup>2</sup></b> | <b>0.043</b> | [-5.5, -0.1]  |
|                                                   | Severe     | 37             | 14    | 8.6  |                 |                           |              |               |
| <b>Number of HbF-inducing alleles<sup>4</sup></b> | Non-severe | 74             | 0.7   | 0.9  | <b>-0.7</b>     | <b>-2.317<sup>3</sup></b> | <b>0.028</b> | [-1.3, -0.1]  |
|                                                   | Severe     | 23             | 1.4   | 1.3  |                 |                           |              |               |
| <b>HU Dose (mg/kg)</b>                            | Non-severe | 131            | 23    | 5    | -0.6            | -0.589 <sup>2</sup>       | 0.557        | [-2.5, 1.3]   |
|                                                   | Severe     | 37             | 23.5  | 5.9  |                 |                           |              |               |
| <b>HU Duration (months)</b>                       | Non-severe | 131            | 34.8  | 26.6 | -8.7            | -1.184 <sup>3</sup>       | 0.243        | [-23.6, 6.1]  |
|                                                   | Severe     | 37             | 43.5  | 42.6 |                 |                           |              |               |
| <b>HbF (%)</b>                                    | Non-severe | 131            | 17.9  | 9.3  | 1.2             | 0.701 <sup>2</sup>        | 0.484        | [-2.2, 4-6]   |
|                                                   | Severe     | 37             | 16.7  | 8.7  |                 |                           |              |               |
| <b>Hemoglobin (g/dL)</b>                          | Non-severe | 131            | 8.9   | 1.3  | -0.1            | 0.275 <sup>3</sup>        | 0.785        | [-0.6, 0.4]   |
|                                                   | Severe     | 37             | 9     | 1.8  |                 |                           |              |               |
| <b>MCV (fL)</b>                                   | Non-severe | 131            | 91.4  | 12.7 | 0.7             | 0.300 <sup>2</sup>        | 0.765        | [-3.8, 5.2]   |
|                                                   | Severe     | 37             | 90.7  | 10.7 |                 |                           |              |               |
| <b>Reticulocytes (%)</b>                          | Non-severe | 131            | 71.7  | 37.8 | -12.6           | -1.739 <sup>2</sup>       | 0.084        | [-26.9, 1.7]  |
|                                                   | Severe     | 37             | 84.3  | 43   |                 |                           |              |               |
| <b>Bilirubin (mg/dL)</b>                          | Non-severe | 131            | 2     | 1.1  | -12.6           | -1.603 <sup>3</sup>       | 0.116        | [-1.1, 0.1]   |
|                                                   | Severe     | 37             | 2.5   | 1.7  |                 |                           |              |               |
| <b>LDH (U/L)</b>                                  | Non-severe | 131            | 503.3 | 150  | -11.5           | -0.282 <sup>3</sup>       | 0.779        | [-93.9, 70.9] |
|                                                   | Severe     | 37             | 514.8 | 235. |                 |                           |              |               |

|                                 |            |     |     | 6   |             |                           |                  |                     |
|---------------------------------|------------|-----|-----|-----|-------------|---------------------------|------------------|---------------------|
| <b>Hospitalizations (/year)</b> | Non-severe | 131 | 0.3 | 0.5 | <b>-2.3</b> | <b>-8.022<sup>3</sup></b> | <b>&lt;0.001</b> | <b>[-2.6, -2]</b>   |
|                                 | Severe     | 37  | 2.6 | 1.7 |             |                           |                  |                     |
| <b>Transfusions (/year)</b>     | Non-severe | 131 | 0.2 | 0.5 | <b>-0.4</b> | <b>-2.796<sup>3</sup></b> | <b>0.007</b>     | <b>[-0.6, -0.1]</b> |
|                                 | Severe     | 37  | 0.6 | 0.7 |             |                           |                  |                     |
| <b>Pain crises (/year)</b>      | Non-severe | 131 | 0.3 | 0.4 | <b>-2</b>   | <b>-6.709<sup>3</sup></b> | <b>&lt;0.001</b> | <b>[-2.6, -1.4]</b> |
|                                 | Severe     | 37  | 2.2 | 1.8 |             |                           |                  |                     |
| <b>ACS (/year)</b>              | Non-severe | 131 | 0   | 0.1 | <b>-0.3</b> | <b>-4.191<sup>3</sup></b> | <b>&lt;0.001</b> | <b>[-0.4, -0.1]</b> |
|                                 | Severe     | 37  | 0.3 | 0.4 |             |                           |                  |                     |

<sup>1</sup>only patients with complete data set were considered; <sup>2</sup>Unpaired t-Test; <sup>3</sup>Welch-Test;

<sup>4</sup> *BCL11A* rs1427407 T, *HMIP* rs66650371 delCTA, *HBG2* rs7482144 A

#### Supplemental Table 4

**Mean values of fetal hemoglobin, daily hydroxyurea (HU) dose and duration of HU-therapy from the *BCL11A* rs1427407 T -negative population compared to the *BCL11A* rs1427407 T -positive population.** n- number of patients available for analysis; SD- standard deviation; t-score of unpaired t-Test; p- t-Test; 95% Confidence Intervals

|                             | <b>BCL11A rs1427407 T</b> | <b>n*</b> | <b>Mean</b> | <b>SD</b> | <b>Mean difference</b> | <b>t-score**</b> | <b>p**</b>   | <b>95%-CI</b>       |
|-----------------------------|---------------------------|-----------|-------------|-----------|------------------------|------------------|--------------|---------------------|
| <b>HbF (%)</b>              | Negative                  | 67        | 16.6        | 9.8       | <b>-3.8</b>            | <b>-2.116</b>    | <b>0.037</b> | <b>[-7.3, -0.2]</b> |
|                             | Positive                  | 49        | 20.4        | 9         |                        |                  |              |                     |
| <b>HU dose (mg/kg)</b>      | Negative                  | 67        | 23.5        | 5.1       | <b>1.9</b>             | <b>2.053</b>     | <b>0.042</b> | <b>[1.9, 3.7]</b>   |
|                             | Positive                  | 49        | 21.6        | 4.7       |                        |                  |              |                     |
| <b>HU duration (months)</b> | Negative                  | 67        | 29.1        | 21.3      | 3.4                    | 0.888            | 0.377        | <b>[-4.2, 11.1]</b> |
|                             | Positive                  | 49        | 25.6        | 19.5      |                        |                  |              |                     |

\*only patients with complete data set were considered; \*\*Unpaired t-test

#### Supplemental Table 5

**Mean values of fetal hemoglobin, daily Hydroxyurea (HU) dose and duration of HU-therapy from the *BCL11A* rs7606173 -negative population compared to the *BCL11A* rs7606173 -positive population.** n- number of patients available for analysis; SD- standard deviation; t-score of unpaired t-Test; p- t-Test; 95% Confidence Intervals

|                             | <b>BCL11A rs7606173 G</b> | <b>n*</b> | <b>Mean</b> | <b>SD</b> | <b>Mean difference</b> | <b>t-score**</b> | <b>p**</b> | <b>95%-CI</b>      |
|-----------------------------|---------------------------|-----------|-------------|-----------|------------------------|------------------|------------|--------------------|
| <b>HbF (%)</b>              | Negative                  | 22        | 17          | 10.4      | -1.5                   | -0.648           | 0.518      | <b>[-6, 3]</b>     |
|                             | Positive                  | 94        | 18.5        | 9.4       |                        |                  |            |                    |
| <b>HU Dose (mg/kg)</b>      | Negative                  | 22        | 23.8        | 4.2       | 1.4                    | 1.145            | 0.255      | <b>[-1, 3.7]</b>   |
|                             | Positive                  | 94        | 22.5        | 5.2       |                        |                  |            |                    |
| <b>HU duration (months)</b> | Negative                  | 22        | 27.8        | 18.1      | 0.3                    | 0.055            | 0.956      | <b>[-9.4, 9.9]</b> |
|                             | Positive                  | 94        | 27.6        | 21.1      |                        |                  |            |                    |

\*only patients with complete data set were considered; \*\*Unpaired t-test

### Supplemental Table 6

Mean values of fetal hemoglobin, daily Hydroxyurea (HU) dose and duration of HU-therapy from the *HMIP* rs66650371 delCTA -negative population compared to the *HMIP* rs66650371 delCTA -positive population. n- number of patients available for analysis; SD- standard deviation; t-score of unpaired t-Test or Welch-Test; p- t-Test or Welch-Test; 95% Confidence Intervals

|                                     | <b>HMIP<br/>rs66650371<br/>delCTA</b> | <b>n*</b> | <b>Mean</b> | <b>SD</b> | <b>Mean<br/>difference</b> | <b>t-score</b>   | <b>p</b>        | <b>95%-CI</b>        |
|-------------------------------------|---------------------------------------|-----------|-------------|-----------|----------------------------|------------------|-----------------|----------------------|
| <b>HbF (%)</b>                      | Negative                              | 107       | 17.8        | 9.6       | <b>-6.2</b>                | <b>-2.085**</b>  | <b>0.039**</b>  | <b>[-12.2, -0.3]</b> |
|                                     | Positive                              | 11        | 24          | 7.3       |                            |                  |                 |                      |
| <b>HU Dose<br/>(mg/kg)</b>          | Negative                              | 107       | 22.9        | 5.1       | <b>3</b>                   | <b>3.439***</b>  | <b>0.002***</b> | <b>[1.2, 4.8]</b>    |
|                                     | Positive                              | 11        | 19.9        | 2.4       |                            |                  |                 |                      |
| <b>HU<br/>duration<br/>(months)</b> | Negative                              | 107       | 26.8        | 18.9      | <b>-23.2</b>               | <b>-1,373***</b> | <b>0.199***</b> | <b>[-60.8, 14.4]</b> |
|                                     | Positive                              | 11        | 50.1        | 55.8      |                            |                  |                 |                      |

\*only patients with complete data set were considered; \*\*Unpaired t-Test; \*\*\*Welch-Test

### Supplemental Table 7

Mean values of fetal hemoglobin, daily Hydroxyurea (HU) dose and duration of HU-therapy from the *HBG2*-polymorphism rs7482144 A -negative population compared to the *HBG2*-polymorphism rs7482144 A -positive population. n- number of patients available for analysis; SD- standard deviation; t-score of unpaired t-Test; p- t-Test; 95% Confidence Intervals

|                                     | <b>HBG2<br/>rs7482144 A</b> | <b>n*</b> | <b>Mean</b> | <b>SD</b> | <b>Mean<br/>difference</b> | <b>t-score**</b> | <b>p**</b>   | <b>95%-CI</b>      |
|-------------------------------------|-----------------------------|-----------|-------------|-----------|----------------------------|------------------|--------------|--------------------|
| <b>HbF (%)</b>                      | Negative                    | 98        | 17.4        | 9.6       | <b>-6.3</b>                | <b>-2.0927</b>   | <b>0.004</b> | <b>[-10.5, -2]</b> |
|                                     | Positive                    | 24        | 23.6        | 8.6       |                            |                  |              |                    |
| <b>HU dose<br/>(mg/kg)</b>          | Negative                    | 98        | 22.9        | 5         | <b>0.3</b>                 | <b>0.260</b>     | <b>0.795</b> | <b>[-2, 2.6]</b>   |
|                                     | Positive                    | 24        | 22.6        | 5.5       |                            |                  |              |                    |
| <b>HU<br/>duration<br/>(months)</b> | Negative                    | 98        | 28.1        | 19.3      | <b>0.5</b>                 | <b>0.118</b>     | <b>0.906</b> | <b>[-8.6, 9.7]</b> |
|                                     | Positive                    | 24        | 27.5        | 24        |                            |                  |              |                    |

\*only patients with complete data set were considered; \*\*Unpaired t-Test

### Supplemental Table 8

Poisson Regression between HbF and frequency of hospitalization, within the  $\gamma$ -globin *XmnI* rs7482144 -negative population. Exp-transformed coefficient of Poisson-regression. p- Poisson regression; n- number of patients available for analysis.

|           | <b>Frequency<br/>of<br/>hospitalization (per year)</b> |
|-----------|--------------------------------------------------------|
| exp(coef) | 0.943                                                  |
| 95%-CI    | 0.923 – 0.963                                          |
| p         | <10 <sup>-4</sup>                                      |
| n         | 97                                                     |

### Supplemental Table 9

**Poisson Regression between total hemoglobin and frequency of hospitalization, within the  $\gamma$ -globin *XmnI* rs7482144 -negative population.** Exp-transformed coefficient of Poisson-regression. p- Poisson regression; n- number of patients available for analysis.

|           | Frequency of hospitalization (per year) |
|-----------|-----------------------------------------|
| exp(coef) | 0.870                                   |
| 95%-CI    | 0.783 – 0.968                           |
| p         | 0.01                                    |
| n         | 130                                     |

### Supplemental Table 10

**Poisson Regression between HbF and frequency of hospitalization, within the  $\gamma$ -globin *XmnI* rs7482144 -positive population.** Exp-transformed coefficient of Poisson-regression. p- Poisson regression; n- number of patients available for analysis.

|           | Frequency of hospitalization (per year) |
|-----------|-----------------------------------------|
| exp(coef) | 0.990                                   |
| 95%-CI    | 0.961 – 1.021                           |
| p         | 0.5217                                  |
| n         | 21                                      |

### Supplemental Table 11

**Poisson Regression between total hemoglobin and frequency of hospitalization, within the  $\gamma$ -globin *XmnI* rs7482144 -positive population.** Exp-transformed coefficient of Poisson-regression. p- Poisson regression; n- number of patients available for analysis.

|           | Frequency of hospitalization (per year) |
|-----------|-----------------------------------------|
| exp(coef) | 0.963                                   |
| 95%-CI    | 0.782 – 1.188                           |
| p         | 0.7259                                  |
| n         | 26                                      |
